1  
2  
3  
4  
5  
6  
7  
8  
9  
10  
11  
12  
13  
14  
15  
16  
17  
18  
19  
20  
21  
22  
23  
24  
25

Predicting an epistasis-rich genotype-phenotype map with a coarse-grained bottom-up model  
of budding yeast polarity

A proof-of-concept for phenotype prediction in model organisms

Werner Karl-Gustav Daalman<sup>1</sup>, Liedewij Laan<sup>1\*</sup>

<sup>1</sup> Department of Bionanoscience, TU Delft, Delft, the Netherlands

\* Corresponding author

E-mail: L.Laan@tudelft.nl

## 26 **Abstract**

27           Accurate phenotype prediction based on genotypical information has numerous societal  
28 applications, such as design of useful crops of cellular factories. However, the prevalence of  
29 epistasis, a phenomenon that prevents many biological systems to perform in accordance with  
30 the sum of its parts, necessitates modelling the complex path between genotype and phenotype.  
31 Defining intermediate levels in this path reduces the complexity of prediction, and may also  
32 elucidate the phenotype coupling to other levels by evolution. Inconveniently, the latter requires  
33 definitions that maintain biophysical justification from the bottom-up, which conflicts with  
34 tractability. By means of a cell growth model, we exemplify a resolution for this conflict by  
35 polarization of Cdc42p in budding yeast, a process requiring clustering of active Cdc42p to one  
36 zone on the membrane and known to generate ample epistasis. Concretely, our model  
37 parsimoniously encompasses constant membrane area growth, stochastic Cdc42p turnover and  
38 a simple, justifiable polarity rule we define as the ‘mesotype’. Through intuitively interpretable  
39 simulations, we describe previously documented, yet puzzling epistasis inside the polarity  
40 module. Moreover, we generate evolutionary relevant predictions e.g., on environmental  
41 perturbations, which are general enough to apply to other systems. We quantify how poor  
42 growth medium can equalize fitness differentials and enables, otherwise very distinct,  
43 evolutionary paths. For example, the fitness of the crippled  $\Delta bem1$  relative to WT can easily be  
44 raised from 0.2 to above 0.95. Finally, we can extend our predictions on epistasis to other  
45 modules. We determine that modelled epistasis predictions only add predictive value when  
46 functional information of the involved modules is included. This inspires a road-map towards  
47 modelling the bidirectional genotype-phenotype map for other model systems with abundant  
48 interactions, where the intermediate levels reveal targets that evolution can optimize and  
49 facilitate a biophysical justifiable incorporation of epistasis.

50

## 51 **Author summary**

52           Efforts to understand how traits follow from genes facilitate a broad range of  
53 applications. For example, crops can be engineered faster to better resist drought, salt and heat  
54 stress, and medicines can be better tailored to individuals. Unfortunately, the path from genes  
55 to traits can generally involve a complex interplay of hundreds of genes and gene products  
56 whose individual contributions can be heavily context-dependent. In this work, we provide the  
57 proof-of-concept in a relatively simple system for a road-map towards elucidating this path. We  
58 have constructed a cell growth model for budding yeast, only involving simple rules on  
59 membrane growth, protein production and centrally, polarity, the process where yeast chooses  
60 the future division site. Despite the simplicity, the polarity rule is fully justifiable from  
61 underlying biophysics. Model simulations show good accordance with formerly puzzling traits,  
62 and also predict the ease with which the environment can change evolutionary paths. While lab  
63 conditions may prohibit the emergence of certain polarity mutations, this becomes much more  
64 feasible ‘in the wild’. The tractable model nature allows us to extrapolate the context  
65 dependence of mutational effects beyond polarity, showing that this method for understanding  
66 trait generation also helps to elucidate protein evolution.

67

## 68 **Introduction**

69           Many fields, such as personalized medicine [1], agriculture [2], chemical production [3]  
70 and forensics [4], will greatly benefit from advances in understanding of the so-called genotype-  
71 phenotype (GP) map, the way that traits are connected to genes. However, this connection can  
72 be quite complex even for known heritable traits (“missing heritability”) [5], limiting the power  
73 of genome-wide association studies [6]. On the one hand, one gene can be responsible for  
74 multiple traits, pleiotropy, although this may not always be very common [7]. On the other  
75 hand, multiple genes can contribute to one trait. Frequently, their individual effects are non-

76 additive in humans [8,9], but also in model systems as *Escherichia coli* [10] or *Saccharomyces*  
77 *cerevisiae* (budding yeast) [11], a phenomenon known as epistasis. Theoretically, epistasis is  
78 expected to surface very easily based on metabolic network analysis [12], and has some known  
79 molecular origins [13]. While epistasis can be inconsequential for fitness evolution [14], its  
80 presence complicates the predictions of phenotypes from genotypes and consequently gene  
81 evolution [15,16]. Therefore, predictions on epistasis constitute an important challenge for GP-  
82 map models.

83

84 As a modelling tool to more easily decompose the GP-map, intermediate levels can be defined  
85 as stepping stones [17], which can be brought under the general denominator of causally  
86 cohesive genotype-phenotype models [18]. An intermediate level may provide an entry point  
87 for additional observables that fine-tune predictions, but an abstract, unobservable entity as a  
88 definition is also possible. Most importantly, a level serves to break up and re-bundle the  
89 intertwined paths from individual genes to traits such that a more modular and hence more  
90 tractable picture arises. In that view, a suitable level definition acts as a tree which branches out  
91 to otherwise difficult to connect genotypes and phenotypes.

92

93 Multiple level examples exist, such as the biofunctional gene ontology level (ontotypes) [19],  
94 the network based trophic level [20], the diffuse endophenotypes [21] and the mathematical  
95 system design space [22]. Ideally, a one-level-fits-all approach exists, where the level definition  
96 facilitates understanding of the emergence of phenotypes from genotypes, while at the same  
97 time elucidating the handles for evolution, the reverse path in the GP-map. This requires  
98 steering away from phenomenological or statistical formulations to move towards biophysically  
99 sound versions, while at the same time maintaining tractability which often complicates bottom-  
100 up approaches. Consequently, the generation of a suitable level definition for the tractable

101 bidirectional path in the GP-map, if possible, involves coarse-graining of the underlying  
102 biophysics, specifically of molecular interactions and protein transport.

103

104 A promising attempt is the iMeGroCy model [23], where growth and cell cycle processes are  
105 simplified, and more details are kept for the module of interest, in this case the metabolism,  
106 which follows Michaelis-Menten kinetics. While effective in modularizing e.g., the pedigree  
107 phenotype emergence as a function of medium in *S. cerevisiae*, it is not straightforward to  
108 extrapolate this approach to other modules. The kinetics crucially assume well-mixed  
109 components, neglecting spatial heterogeneity arising from crowding in the cell [24].  
110 Furthermore, coupling of diffusion and reactions involves conditions for pattern formation [25]  
111 that should be taken into account. Inclusion of spatio-temporal information is also known to be  
112 essential to understand the evolution of a network [26]. We therefore construct a cell growth  
113 model that encompasses the lessons derived from rigorous reaction-diffusion analysis, and  
114 maintains the simplicity across other growth features. The level definition associated with  
115 coarse-graining the molecular details will be called the ‘mesotype’.

116

117 For the purpose of testing this bottom-up modelling approach, we require a model system  
118 known to exhibit ample epistasis (e.g., in doubling times) [27], namely polarity establishment  
119 in *S. cerevisiae*. Here, the unicellular organism budding yeast breaks its internal spherical  
120 symmetry to direct bud growth in one direction. This process is essential for the proliferation  
121 of the cell and relies on correct functioning of Cdc42p [28]. The mechanics behind this process  
122 is known to large detail (except the role of unexpected wildcard Nrp1p [27]), and involves  
123 clustering of the active form of small GTPase Cdc42p, which is bound to a GTP molecule, to  
124 one patch on the plasma membrane (Fig. 1A). In a wild-type (WT) background, rapid Cdc42p  
125 clustering is governed by a positive feedback involving Bem1p and Cdc24p [29], the relevant

126 guanine nucleotide exchange factor (GEF) for Cdc42p [30], which appropriately transport and  
 127 activate Cdc42p. By contrast, its deactivation outside the membrane patch is ensured by GTPase  
 128 activating proteins (GAPs), a protein class to which Bem2p, Bem3p [30], Rga1p [31] and  
 129 Rga2p [32] pertain.  
 130

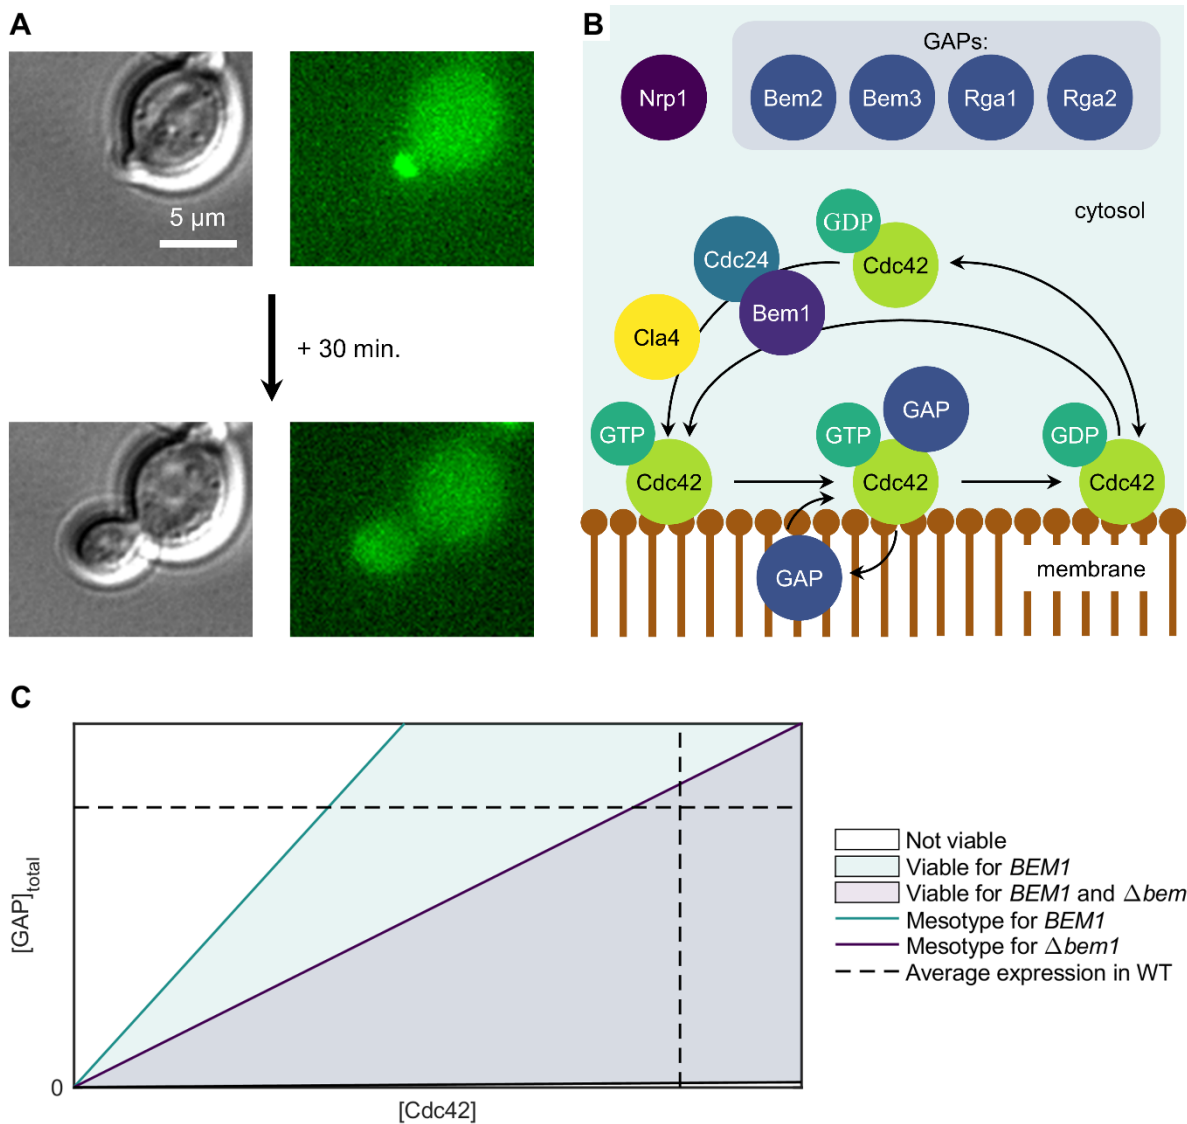

131  
 132 **Fig 1. Yeast polarity as suitable genotype-phenotype map model for epistasis description.**  
 133 (A) Brightfield (left) and widefield fluorescence example images of a polarizing budding yeast  
 134 cell (scale bar 5  $\mu\text{m}$ ). Key for polarity is clustering of active Cdc42p (of which a binding partner  
 135 is fluorescently labelled in the images) to one zone on the membrane. This location marks the  
 136 site of polarized growth. (B) Schematic overview of polarity protein core (proteins not to scale).

137 A positive feedback for (active) Cdc42p-GTP is mediated by either the Bem1p-Cdc24p  
138 complex, and likely to lesser extent by Cla4p. For Nrp1p it is unclear how it mechanistically  
139 links to other components. (C) Schematic diagram depicting phenotype (viability) as function  
140 of genotype through Cdc42p (active and inactive) and GAP concentration in the cell with or  
141 without Bem1p. An intermediate, the ‘mesotype’, is defined here as the limiting Cdc42p  
142 concentration. Epistasis is readily observed as the same increase in e.g., GAP concentration can  
143 yield inviability in the  $\Delta bem1$  background but not in the *BEM1* background.

144

145 In absence of Bem1p, GAPs can more easily deactivate even the Cdc42p localized in the main  
146 patch that marks the future division site, which would generate a lethal situation for the cell.  
147 This can be circumvented if the abundance of Cdc42p is large enough to continuously sequester  
148 the GAPs found around the main patch, forming a rescue mechanism to establish polarity when  
149 combined with a generic positive feedback [33], such as through Cla4p [34] (Fig. 1B).  
150 Theoretical analysis of the underlying reaction-diffusion equations reveals a strong dependence  
151 of the ability to polarize success on the GAP/Cdc42p copy number ratio, where a broader range  
152 is viable in the presence of Bem1p [33] (Fig. 1C). This motivates a coarse-graining of the  
153 protein dynamics to a threshold for the protein concentration, which forms the mesotype level  
154 definition in this context.

155

## 156 **Results**

### 157 **Coarse-grained bottom-up model design**

158 **Coarse description of cell expansion.** We modeled the yeast cell cycle as a process involving  
159 three modules, namely coarse-grained cell growth, protein turnover and cell polarity (Fig. 2A).  
160 A parsimonious approach to cell membrane growth was chosen consisting of two stages of  
161 constant membrane area growth, as several alternative formulations proved immaterial for

162 phenotype description (S1 Fig.). The membrane expansion rates ( $C_1$  for G1,  $C_2$  elsewhere) were  
 163 brought in decent agreement with literature [35,36] (see S2 Table for further justification of  
 164 parameter choices.).  
 165

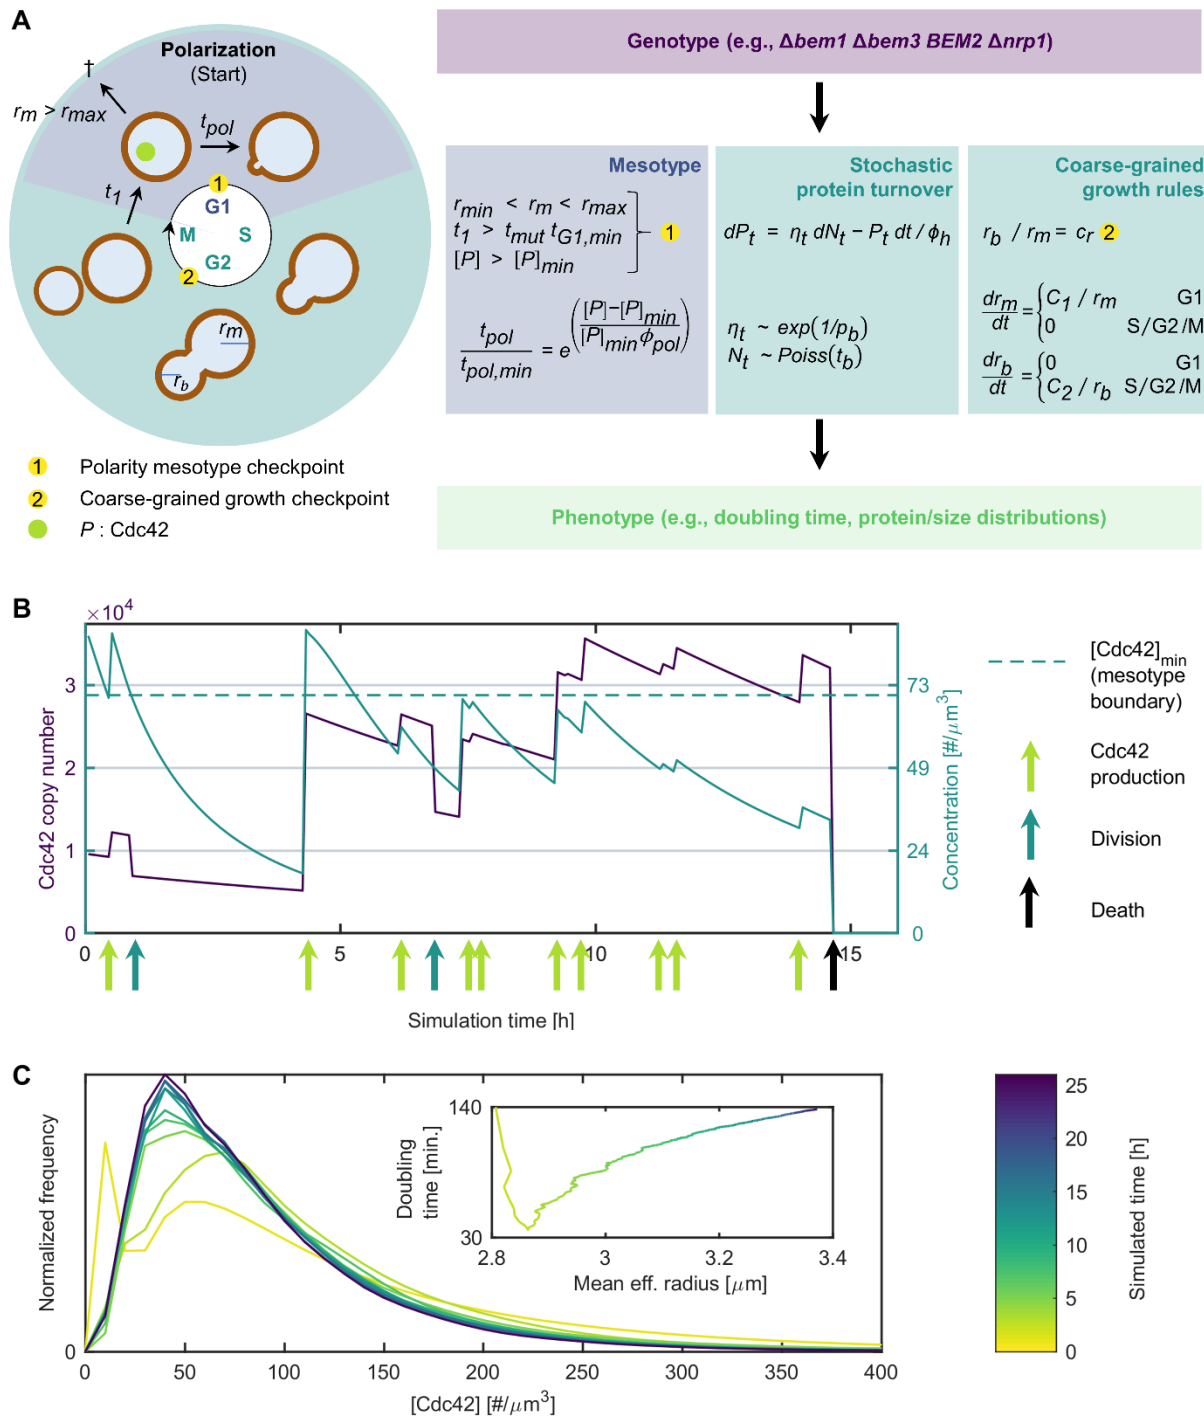

166  
 167 **Fig 2. Coarse-grained, bottom-up growth model integrating the polarity mesotype to**  
 168 **facilitate epistasis and phenotype prediction.** (A) Schematic depiction of the translation of



169 the budding yeast cell cycle to model processes and parameters. Central is the moment of  
170 polarization which occurs when the cell has sufficient size, has been sufficiently long in G1 and  
171 has a Cdc42 concentration (abbreviated as  $[P]$ ) exceeding a threshold, the latter defining the  
172 mesotype checkpoint for this system. Together with a coarse description of cell growth  
173 (constant membrane expansion of either mother or bud and a bud size checkpoint), stochastic  
174 protein production and deterministic degradation, this allows construction of the genotype-  
175 phenotype map. (B) Example trace of the Cdc42 copy number (blue) and concentration (green)  
176 of a single cell, which are subject to protein production and degradation (and dilution for  
177 concentrations). The cell must exceed the mesotype threshold ( $[P]_{\min}$ ) before division can take  
178 place. When this is delayed for too long, the cells expands beyond  $r_{max}$  and the cell dies (after  
179 almost 15h). (C) Convergence of Cdc42 copy number distribution during simulations.  
180 Simulated time since ancestor is approximate as birth times of the cells in the starting population  
181 are distributed across an 83 min. bandwidth. The inset shows how the estimates of the  
182 population doubling time and the average effective cell size equilibrate as a function of time.

183  
184 The first stage involves isotropic growth of a spherical cell of radius  $r_m(t)$ , which corresponds  
185 to the G1 phase including the Start transition, at the end of which a checkpoint must be passed,  
186 which is further explained in the following paragraph. Thereafter, the cell switches to the second  
187 stage of growth, where the membrane grows in a polarized manner defining a bud with radius  
188  $r_b(t)$ , while the rest of the mother cell retains its size. The bud membrane growth area is constant  
189 for the modelled equivalent of the S, G2 and M phase but larger than for the mother in G1. Bud  
190 growth lasts until the second checkpoint, at which the bud proceeds as an independent cell when  
191 it has reached a sufficient size ( $r_b=r_m c_r$ ).

192

193 **Biophysically justifiable mesotype inclusion.** The cells grow isotropically until three  
194 conditions are met, defining the first checkpoint. Firstly, the radius  $r_m$  of the cell must exceed  
195 the minimum size threshold  $r_{min}$ . Secondly, the time in this stage ( $t_I$ ) exceeds a minimum time  
196 ( $t_{GI,min}$ ), which may be modified by a factor  $t_{mut}$  for certain mutations with respect to WT.  
197 These two criteria result from key events in the timing pathway, particularly cell size dependent  
198 control of Cln3p arrival to the nucleus by Ydj1p [37]. Finally, the concentration of Cdc42p,  $[P]$ ,  
199 must exceed a minimum concentration threshold  $[P]_{min}$ . The existence of the Cdc42p  
200 concentration threshold, which we define as the ‘mesotype’ for a particular mutant, follows  
201 from rigorous theoretical and experimental analysis of reaction-diffusion equations of the  
202 polarity network [33].

203

204 Once all three conditions are met, isotropic growth continues for a period of  $t_{pol}$ , which lasts at  
205 least  $t_{pol,min}$  and depends exponentially on the relative excess Cdc42 concentration above the  
206 threshold (scaled by  $\phi_{pol}$ ). This is a simplified representation of the results in [33] and reflects  
207 the period where Cdc42p clusters to one zone in the membrane. As it can occur that the Cdc42  
208 threshold is never exceeded while growth continues and concentration are diluted, the cell is  
209 considered dead when its radius exceeds the maximum size  $r_{max}$ .

210

211 **Noisy protein production.** Whether the Cdc42 concentration condition is met depends also  
212 strongly on protein production, which is modelled as a stochastic process. Since mRNA lifetime  
213 of Cdc42 is much smaller than its protein half-life  $t_h$  [38,39], Cdc42p production essentially  
214 follows from instantaneous bursts, which are modelled as an compound Poisson process burst  
215 process  $N_t$  with exponentially distributed size  $\eta_t$  (on average  $p_b$ ) at exponentially distributed  
216 intervals (on average  $t_b$ ) [40]. Because it may be important for the precise crossing time of the  
217 polarity threshold, we avoid absorbing protein degradation in an effective burst size, by

218 explicitly adding degradation to the Cdc42 copy number process  $P_t$ . Stochasticity in total GAP  
219 copy number is not included as the cell-to-cell variability is much less than for Cdc42p (GAP  
220 coefficient of variation  $< 0.15$ , only just above the smallest measured value of 0.10 [41],  
221 compared to 0.83 for Cdc42p measured in this study).

222

### 223 **Coarse-grained bottom-up model verification and validation**

224 Firstly, the model design was verified by simulations of the computational model  
225 implementation (see Materials and Methods) which allowed tracking the states of individual  
226 cells or the population. Fig. 2B shows a Cdc42p copy number and concentration time trace of  
227 a single cell. The Cdc42p production is burst-like and occurs as indicated on the time axis. The  
228 copy number trace shows the proteins degrade between these bursts, and there is also dilution  
229 due to cell volume growth for the concentration curve. In this example, divisions occur twice  
230 shortly after checkpoint 1 has been passed, which also implies exceeding the mesotype  
231 concentration threshold. Ultimately, this cell fails to exceed the threshold a third time and dies  
232 after exceeding the maximum size  $r_{max}$ , as designed. Fig. 2C shows the rate of convergence of  
233 relevant population phenotypes (without plotting the dilution step). After the population has  
234 grown approximately 25 hours counted from the ancestor seed, the Cdc42p distribution has  
235 largely converged. The size and doubling time change 0.6% and 0.9% respectively across the  
236 last 200 minutes, well within the typical experimental error (see S2 Fig. for an example of  
237 results including dilution).

238

239 Secondly, we turned to the model validation, where five parameters (four mesotype thresholds,  
240 and one *nrp1*-dependent G1 time factor  $t_{mut}$ ) are fitted. Non-trivial previously measured  
241 observables are considered mostly from [27]; strong epistasis in growth rates between GAP  
242 mutants only in the  $\Delta bem1$  background, strong epistasis between *BEM1* and *NRP1*, and non-

243 monotonous optimization of G1 times for (reconstructed) experimentally evolved mutants  
244 starting from  $\Delta bem1$ . For the latter phenotype, the acceleration of G1 speed of the  $\Delta bem1$  cells,  
245 despite its poor fitness, compared to WT cells is particularly noteworthy. This combines to a  
246 total of 20 phenotypes, well identifying the five free parameters.

247

248 **Description of the coarse GP-map exhibiting epistasis.** The simulated growth rates of  
249 polarity mutants of [27] were calculated as a function of mesotype ( $[Cdc42]_{min}$ ), which scales  
250 linearly with total GAP concentration  $[GAP]_{tot}$  due to the cone-like structure of Fig. 1C. These  
251 can be converted to relative fitness values through division by the WT growth rate. Fitness  
252 values in presence of *NRPI* were brought in accurate accordance with experiments of [27] (Fig.  
253 3A) and consequently, the observed GAP epistasis is well (and robustly, see S1 Fig.) described.  
254 The *nrp1* background was not always well fitted (5/8 correct within experimental error),  
255 although these mutants suffered from relatively large experimental uncertainties. The four fitted  
256 mesotype threshold concentrations are consistent with the *bem3* deletion effect that is twice as  
257 large as for *bem2*. Given the GAP abundancies [42], this sets the *in vivo* Bem3p effective GAP  
258 activity to be almost four times as large as for Bem2p, a difference much less pronounced than  
259 measured *in vitro* [30].

260

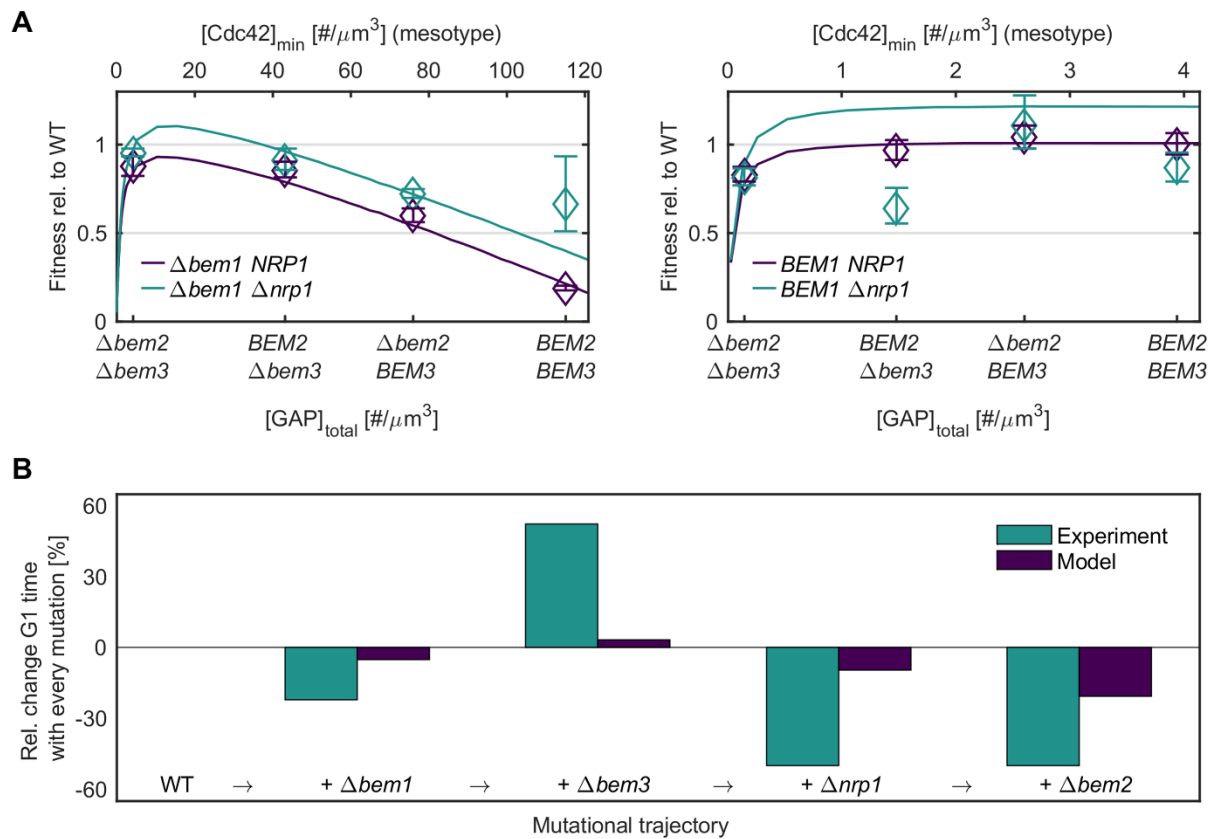

261  
 262 **Fig 3. Comparison of the coarse-grained growth model to experimental data on coarse**  
 263 **and subtler GP-maps.** (A) Experimental fitness values relative to WT (phenotypes) for 16  
 264 different polarity genotypes [27] denoted by diamonds, which are fitted by the model as  
 265 depicted by the dark purple and emerald lines for *nrp1* and *NRP1* background respectively.  
 266 GAP genotypes can be linearly linked to the minimum Cdc42 concentration to polarize, the  
 267 mesotype, as displayed on the top horizontal axis. Error of the *BEM2 NRP1* was not available  
 268 and conservatively guessed. (B) The detailed phenotype of minimum G1 time as displayed by  
 269 WT and four polarity mutants, comprising a single evolutionary trajectory. Experimental values  
 270 are from [27] in emerald (defined there as tie to first polarity spot), model values are in dark  
 271 purple (defined here as the time in G1 until both the size and time criteria are met). Both cases  
 272 are normalized to their respective WT values, such that each column denoted the relative change  
 273 in G1 time compared to the previous step in the trajectory.

274

275 **Incorporation of a subtler GP-map.** While doubling times represent a rather coarse  
276 phenotype, an example of the more detailed traits that can be modelled is time spent in G1. To  
277 this end, simulations were performed with half the normal membrane area rates  $C_1$  and  $C_2$ , to  
278 mimic the poorer content of synthetic medium in which experiments from literature [27] were  
279 performed. The observed trends in G1 times along the evolutionary trajectory from WT to the  
280 fully evolved mutant in that paper were qualitatively matched, including the unusual inversion  
281 for the  $\Delta bem1$  (Fig. 3B). The logic behind this inversion is that for WT cells in slower growth  
282 medium, the size requirement is the most important criterion for the first checkpoint of Fig. 2A,  
283 which can last longer than the minimum G1 time. By contrast, the on average less fit and larger  
284  $\Delta bem1$  cells are relatively more stalled by the minimum time criterion, and the long overall  
285 cycle times arise due to lengthy other phases.

286

287 A more realistic (and less coarse-grained) modification of the modelled cell cycle progression  
288 can improve the quantitative match. Suppose for example the  $\Delta bem1$  cells if the assumed  
289 minimum G1 time set is not a constant but a distribution (times for symmetry breaking in  
290 daughter cells can be quite stochastic [43]). Some  $\Delta bem1$  cells have an early opportunity to  
291 fulfil the mesotype threshold concentration requirement, with which they usually struggle,  
292 while others are delayed more. This increases the cell-to-cell variation in fates in G1, since cells  
293 with fast G1 times are most likely to generate a first spot, while slow cells never generate this  
294 spot do not show up in the statistics. This is how less coarse-graining can lead to a larger  
295 decrease in G1 times than is the case with constant  $t_{G1,min}$ .

296

297 **Genetic interaction predictions**

298 **Poorer medium quality reduces fitness differentials.** As aforementioned, the effect of the  
299 environmental effects such as changes in growth media quality can be integrated in the model

300 through a change in membrane area growth rates  $C_1$  and  $C_2$ . To assess the evolutionary  
301 consequences of poorer medium content, we considered a roughly three-fold area growth rate  
302 range that caused WT fitness to span between 0.5 and 1 (normalized to maximum growth). Fig.  
303 4 shows the fitness ratio for various media within this range between the  $\Delta bem1$  and  $BEM1$   
304 background, as a function of GAP concentration, visualizing the trend of smaller fitness  
305 differentials for decreasing GAP concentrations and decreasing medium quality.

306

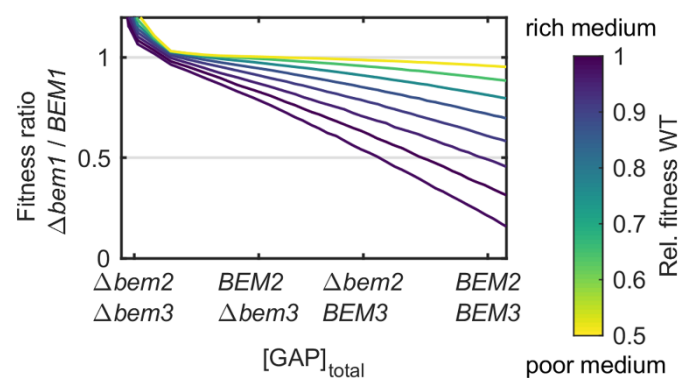

307

308 **Fig 4. Growth model predictions of the environmental effect on polarity epistasis.**

309 Simulated fitness differences between  $BEM1$  and  $bem1$  backgrounds as a function of medium  
310 quality, which is integrated in the model through varying cell membrane area growth rates. The  
311 colors depict these rates through their associated WT doubling times. Generally, poorer medium  
312 reduces differences in fitness and genetic interactions between GAPs when comparing the  
313  $BEM1$  and  $bem1$  backgrounds.

314

315 The intuition for this result is as follows. As seen in Fig. 3A, the  $\Delta bem1$  background suffers  
316 from the high Cdc42p concentration threshold, relevant at checkpoint 1 (fig. 2A), and recover  
317 fitness when this threshold is lowered by successive GAP deletions. Fig. 2B had in turn shown  
318 the strong negative influence of dilution on the ability to exceed this threshold. Therefore,  
319  $\Delta bem1$  cells benefit greatly from reducing the speed of membrane growth, while WT cells, for  
320 which the threshold is not a problem at all, only suffer from slowing down the membrane

321 growth. An unmodelled inhibitor of this effect would be a reduced Cdc42p production in  
322 medium with lower quality. However, Cdc42p expression is at least known to remain stable  
323 upon switching from dextrose to ethanol, an inferior carbon source [44].

324

325 **Information on biological function of mutated genes are a prerequisite for predicting**  
326 **epistasis.** To assess whether we can extend the model predictions beyond polarity, we focus  
327 on predictions of epistasis. This is the most generalizable quantity to assess cross-modular  
328 interactions and is as mentioned in the introduction critical for constructing GP-maps. For this  
329 purpose, we considered high-throughput data on numerous mutants, with varying levels of  
330 detail regarding the mutant phenotypes, which we define as the information content. This  
331 information will determine the precision with which the mutant can be incorporated into the  
332 model.

333

334 Concretely, we restrict ourselves to epistasis between general mutants and  $\Delta bem1$ , since we  
335 suspected that fitness differences in this ill background are exaggerated and hence more likely  
336 to have been picked up in literature. We used Bayesian analysis on the prevalence of epistasis  
337 signs to determine what degree of information on the general mutants add value to sign  
338 predictions. The general mutants were absorbed in the model in three different ways; either  
339 using the coarse information on the single deletion phenotype (deleterious or beneficial), or the  
340 mid-detail information on the single deletion phenotype (faster, slower, larger or smaller in G1),  
341 or the functional information (proteasomal, phospholipid or ribosomal). Within these three  
342 categories, there is a further subdivision into two sets, based on whether the model predicts  
343 positive or negative epistasis with  $\Delta bem1$  (Fig. 5A).

344



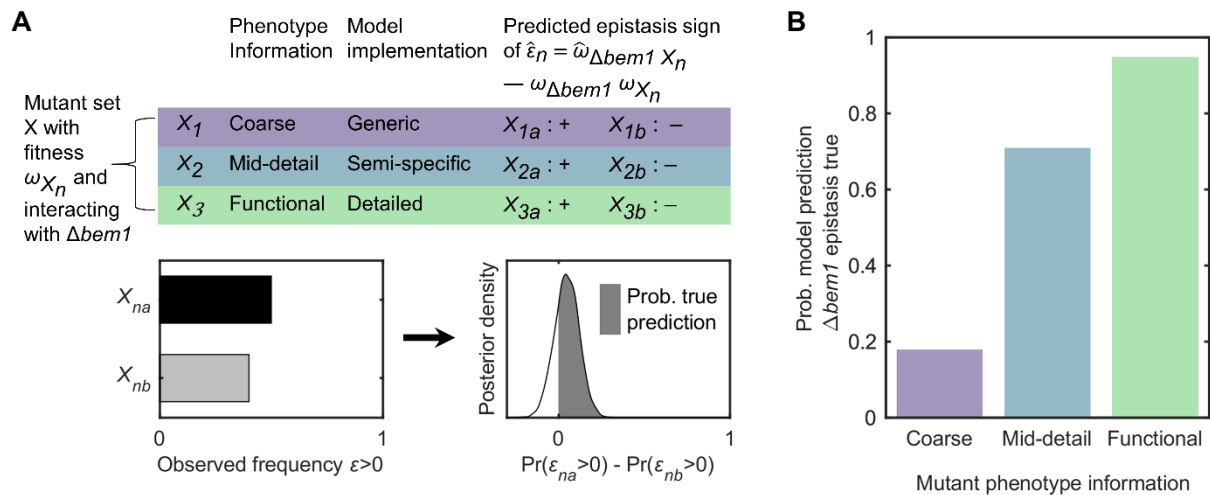

345

346 **Fig 5. Adequate model predictions of epistasis rely on functional information concerning**

347 **mutations.** (A) Workflow for model prediction on epistasis  $\epsilon$  of general mutants (fitness  $\omega_X$ )

348 with  $\Delta bem1$ . Mutants are divided into three categories and two subsets, depending on the

349 specificity of the mutant phenotype and model implementation and the subsequent model

350 prediction. For each category  $n$  and subset  $a/b$ , the beta posterior density of the observed

351 positive epistasis fraction can be constructed (from a binomial likelihood and a uniform prior). The

352 probability of a true prediction is then defined as the area below the posterior density of the

353 difference of sets  $a$  (prediction  $\epsilon > 0$ ) and  $b$  (prediction  $\epsilon < 0$ ). (B) Bars reflecting Bayes factors

354 for the model hypothesis; the ratio between the odds that the model prediction is true and false.

355

356 Firstly, mutants of which the coarse information are incorporated through modifying the

357 membrane area growth rates, concretely smaller and larger rates for deleterious and beneficial

358 mutants respectively. As seen in Fig. 4, smaller rates reduce the deleterious effect of the  $\Delta bem1$ ,

359 prompting the prediction that negative epistasis with  $\Delta bem1$  is generally more prevalent for

360 deleterious mutants than for beneficial mutants. The analysis shows no evidence that this

361 statement is correct (only a 20% chance, Fig. 5B).

362

363 Analogously, integrating the mutants on mid-detail information implies changing  $t_{G1,min}$  (shorter  
364 when fast in G1, longer when slow) or  $r_{min}$  (lower when small in G1, higher when large).  
365 Mutants with shorter  $t_{G1,min}$  and lower  $r_{min}$  disproportionately benefit the  $\Delta bem1$  which suffers  
366 most from Cdc42p dilution before the mesotype checkpoint. Therefore, the model prediction is  
367 that mutants fast or small in G1 have more negative epistasis with  $\Delta bem1$  than mutants that are  
368 slow or large in G1. Still, the experimental evidence is not compelling (70% chance).

369

370 Finally, when incorporating the mutants using functional information, we lower  $\tau_h$   
371 (proteasomal), membrane growth rates (phospholipid) and mean burst size  $p_b$  (ribosomal). The  
372 former two, which mitigate the problematic lack of Cdc42p in the  $\Delta bem1$  to some extent, should  
373 exhibit more negative epistasis than the latter one, which deteriorates the  $\Delta bem1$  situation.  
374 There is strong positive evidence for this statement (using the rules-of-thumb on Bayesian odds  
375 ratios [45]), which is true with around 95% certainty. This displays the benefit of integrating  
376 mutants based on functional information.

377

## 378 **Discussion**

379 We have constructed, verified, validated and applied a coarse-grained growth model  
380 encompassing the newly defined mesotype in order to describe phenotypes (subject to epistasis)  
381 from genotypes or predict these. When ample molecular information is present, as is the case  
382 for Bem1p and the GAPs, this strategy is quite successful to predict cell cycle times, given the  
383 largely good quantitative matches in Fig. 3A and C and qualitative match for the peculiar G1  
384 time inversion for the  $\Delta bem1$  compared to WT (Fig. 3B).

385

386 Additionally, the information content about the phenotypes, associated with mutated  
387 genes, required for predicting epistasis was assessed as it is a general hurdle for GP-map

388 models. As the mutant is encapsulated in our model through more detailed phenotypes, the  
389 prediction quality increases accordingly. Typically, functional information is required to make  
390 meaningful epistasis sign predictions (Fig. 5), similar to the ontotype strategy [19]. This  
391 delimits the scope of this model.

392

393 Nevertheless, when only medium detail phenotypical information on the single deletion mutant  
394 (such as in the case with Nrp1p) is used, predictions can still be of decent quality (Fig. 3A). The  
395 efficacy of phenomenologically integrating Nrp1p into this model provided substance to the  
396 claim that this protein is mechanistically involved in shortening G1. Since obtaining near-  
397 complete information on the function of proteins is not within reach for most organisms, it is  
398 comforting that mildly positive results may be achieved with phenomenological information  
399 when building an otherwise biophysically justifiable bottom-up model.

400

401 Because the yeast polarity example shows the feasibility of our modelling strategy, we aim to  
402 provide a road-map to apply these to general genotype-phenotype maps (Fig. 6). The core  
403 functional component, in this case polarity, is modelled by justifiable coarse-graining, which  
404 results in the mesotype of the system. This mesotype in turn emerges from functional subunits  
405 [33], identifiable from the rigorous analysis of the underlying biophysics. Once multiple model  
406 systems (such as the PAR protein system in *Caenorhabditis elegans* [46]) have been described  
407 in this manner, it may be possible to construct a limited library of recurring subunits, making it  
408 easier to recognize these in other systems and construct the corresponding mesotype. In  
409 combination with a coarse-grained view of cell growth and noisy protein production, this  
410 completes the bottom-up (population) phenotype prediction process.

411

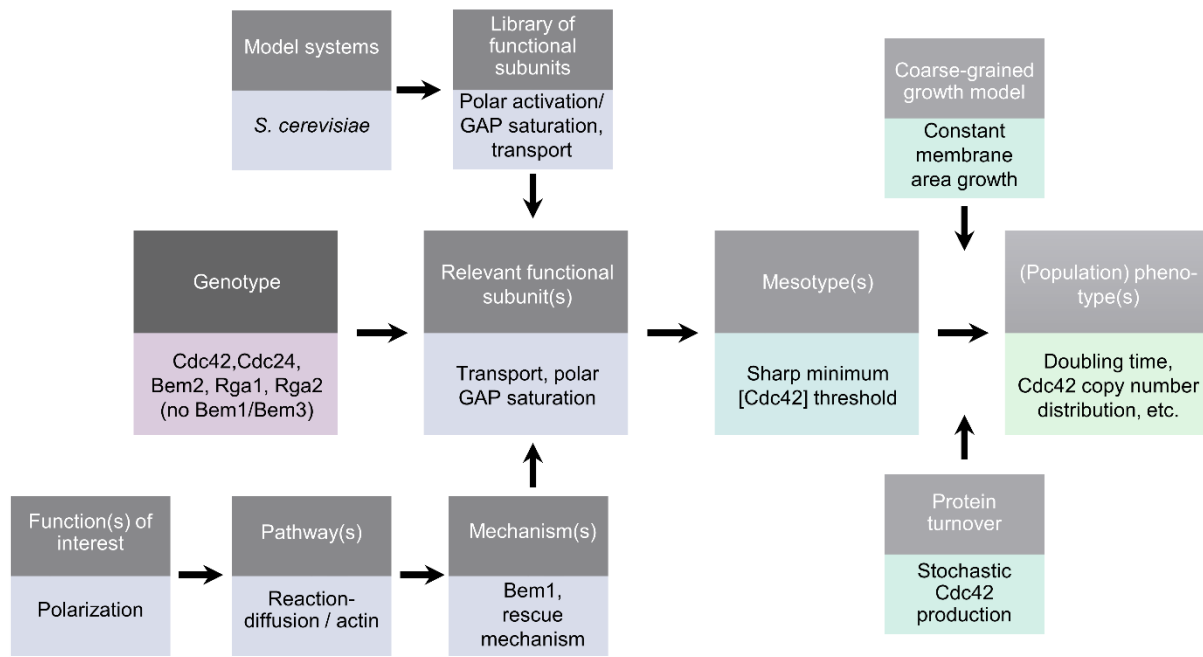

412

413 **Fig 6. Proposed flow chart for phenotype predictions through intermediate levels.** Bottom-

414 up approach for phenotype prediction from genotype through mesotypes, which result from

415 selecting the appropriate functional subunits. When more model systems are analyzed (e.g.,

416 polarization in *S. cerevisiae*, the min-system in *E. coli*, PAR-system in *C. elegans*), the toolbox

417 from which to retrieve the relevant subunits expands. While it is possible to bypass the

418 functional subunits and retrieve the mesotypes with rigorous numerical analysis of simulations

419 of all protein components, the path displayed lends itself better to transfer knowledge of

420 mesotypes to other systems. Bottom-half exemplifies the flow chart with the yeast polarity case.

421

422 Furthermore, the benefit of this approach is the tractable identification of evolutionary relevant

423 quantities. For example, the GAP epistasis is accurately retrieved (Fig. 3A), and the prediction

424 of the poor medium effect to reduce fitness differentials (Fig. 4) readily allows interpretation.

425 The benefit of slower medium for the ill mutant  $\Delta bem1$  fits the picture that haploinsufficiency

426 in YPD is typically lifted in poorer medium [47], and opens up a distinct avenue for adaptation.

427 Given that laboratory conditions are much more comfortable than the conditions under which

428 historical evolution has taken and is taking place, the likelihood of fixation of a polarization

429 network optimized on Bem1p or an rescue mechanism (as experimentally occurring in [27])  
430 becomes much more similar than naively expected. Moreover, this insight is quantifiable, we  
431 show e.g., that merely slowing WT down by a factor of 2 reduces the relative fitness differential  
432 to 0.05. Given that *BEM1* has comparable characteristics to an essential gene, the evolvability  
433 of essential genes may be greater than anticipated.

434

## 435 **Materials and Methods**

436 Model simulations were performed in MATLAB R2016a following a partial leap-like  
437 Gillespie algorithm [48] implementation (the G1 time until  $r < r_{min}$  and  $t_1 < t_{G1,min}$ ,  $t_{pol}$  and the  
438 time through S/G2/M are one leap each). The core function and example script to demonstrate  
439 the functionality are found in S1 Code and S2 Code respectively.

440 Model parameters are summarized in S2 Table. An initial population asynchronized  
441 across a bandwidth of 83 minutes (all cells with equal radii of 2.2  $\mu\text{m}$  and without protein) is  
442 grown until a population size of  $>5$  million, after which a subsample of 1000 cells is regrown  
443 to the same condition. Doubling times are the average of the last hundred moving window (size  
444 201 min.) linear regressions on the log number of cells.

445

446 Model calibration was done by supplying expression burst parameters for Cdc42p inferred from  
447 flow cytometry. These were fine-tuned, together with area growth rates  $C_1$  and  $C_2$ , to yield a  
448 mean protein copy number of around 8700 [42] at the optimal growth doubling time of 83  
449 minutes (WT in YPD [27]). Fluorescence measurements of the required *CDC42pr-GFP-*  
450 *CDC42* strain and a non-fluorescent strain (from [49,50]) were performed using a BD FACScan  
451 flow cytometer. Cells were pregrown in YNB (Sigma) + CSM -Met (Formedium) + 2%  
452 dextrose (Sigma-Aldrich), diluted to an  $\text{OD}_{600}$  of 0.1 and measured after 15h.

453

454 Doubling times of [27] in Fig. 3A were fitted using the native *fminsearch* on a normalized score  
455 objective for varying  $[Cdc42]_{\min}$  and manual inspection for setting  $t_{mut}$  (to 0.75) for the *nrp1*  
456 deletion. Interaction and phenotype data for Fig. 5 were obtained from BioGRID [51] and SGD  
457 [52] respectively (date of access March 2018).

458

## 459 **Acknowledgements**

460 We thank Marit Smeets for flow cytometry measurements of two strains and Leila Iñigo de la  
461 Cruz for growth data on one of these. Additionally, we thank Fridtjof Brauns for careful reading  
462 of the manuscript and Sophie Tschirpke for help in optimizing figure formatting.

463

## 464 **References**

- 465 1. Li C. Personalized medicine—the promised land: are we there yet? *Clin Genet.*  
466 2011;79(5):403–12.
- 467 2. Cobb JN, DeClerck G, Greenberg A, Clark R, McCouch S. Next-generation phenotyping:  
468 requirements and strategies for enhancing our understanding of genotype–phenotype  
469 relationships and its relevance to crop improvement. *Theor Appl Genet.* 2013  
470 Apr;126(4):867–87.
- 471 3. Oud B, Maris AJA, Daran J-M, Pronk JT. Genome-wide analytical approaches for reverse  
472 metabolic engineering of industrially relevant phenotypes in yeast. *FEMS Yeast Res.* 2012  
473 Mar;12(2):183–96.
- 474 4. Kayser M, Schneider PM. DNA-based prediction of human externally visible  
475 characteristics in forensics: Motivations, scientific challenges, and ethical considerations.  
476 *Forensic Sci Int Genet.* 2009 Jun;3(3):154–61.
- 477 5. Maher B. The case of the missing heritability: when scientists opened up the human  
478 genome, they expected to find the genetic components of common traits and diseases. But

- 479 they were nowhere to be seen. Brendan Maher shines a light on six places where the missing  
480 loot could be stashed away. *Nature*. 2008;456(7218):18–22.
- 481 6. Visscher PM, Wray NR, Zhang Q, Sklar P, McCarthy MI, Brown MA, et al. 10 Years of  
482 GWAS Discovery: Biology, Function, and Translation. *Am J Hum Genet*. 2017  
483 Jul;101(1):5–22.
- 484 7. Wagner GP, Zhang J. The pleiotropic structure of the genotype–phenotype map: the  
485 evolvability of complex organisms. *Nat Rev Genet*. 2011 Mar;12(3):204–13.
- 486 8. Cordell HJ. Detecting gene–gene interactions that underlie human diseases. *Nat Rev Genet*.  
487 2009;10(6):392–404.
- 488 9. Zuk O, Hechter E, Sunyaev SR, Lander ES. The mystery of missing heritability: Genetic  
489 interactions create phantom heritability. *Proc Natl Acad Sci*. 2012 Jan 24;109(4):1193–8.
- 490 10. Wünsche A, Dinh DM, Satterwhite RS, Arenas CD, Stoebel DM, Cooper TF. Diminishing-  
491 returns epistasis decreases adaptability along an evolutionary trajectory. *Nat Ecol Evol*.  
492 2017;1(4):1–6.
- 493 11. van Leeuwen J, Pons C, Mellor JC, Yamaguchi TN, Friesen H, Koschwanez J, et al.  
494 Exploring genetic suppression interactions on a global scale. *Science*. 2016 Nov  
495 4;354(6312):aag0839-aag0839.
- 496 12. Kryazhimskiy S. Emergence and Propagation of Epistasis in Metabolic Networks. *bioRxiv*.  
497 2020 Jun 30;2020.05.24.113001.
- 498 13. Lehner B. Molecular mechanisms of epistasis within and between genes. *Trends Genet*.  
499 2011 Aug;27(8):323–31.
- 500 14. Kryazhimskiy S, Rice DP, Jerison ER, Desai MM. Global epistasis makes adaptation  
501 predictable despite sequence-level stochasticity. *Science*. 2014;344(6191):1519–1522.
- 502 15. Papp B, Notebaart RA, Pál C. Systems-biology approaches for predicting genomic  
503 evolution. *Nat Rev Genet*. 2011 Sep;12(9):591–602.

- 504 16. Miton CM, Tokuriki N. How mutational epistasis impairs predictability in protein evolution  
505 and design. *Protein Sci.* 2016;25(7):1260–72.
- 506 17. Blanco-Gómez A, Castillo-Lluva S, del Mar Sáez-Freire M, Hontecillas-Prieto L, Mao JH,  
507 Castellanos-Martín A, et al. Missing heritability of complex diseases: Enlightenment by  
508 genetic variants from intermediate phenotypes. *BioEssays.* 2016 Jul;38(7):664–73.
- 509 18. Rajasingh H, Gjuvsland AB, Våge DI, Omholt SW. When Parameters in Dynamic Models  
510 Become Phenotypes: A Case Study on Flesh Pigmentation in the Chinook Salmon (  
511 *Oncorhynchus tshawytscha*). *Genetics.* 2008 Jun;179(2):1113–8.
- 512 19. Yu MK, Kramer M, Dutkowski J, Srivas R, Licon K, Kreisberg JF, et al. Translation of  
513 Genotype to Phenotype by a Hierarchy of Cell Subsystems. *Cell Syst.* 2016 Feb;2(2):77–  
514 88.
- 515 20. Johnson S, Jones NS. Looplessness in networks is linked to trophic coherence. *Proc Natl*  
516 *Acad Sci.* 2017 May 30;114(22):5618–23.
- 517 21. John B, Lewis KR. Chromosome variability and geographic distribution in insects. *Science.*  
518 1966;152(3723):711–21.
- 519 22. Lomnitz JG, Savageau MA. Elucidating the genotype–phenotype map by automatic  
520 enumeration and analysis of the phenotypic repertoire. *NPJ Syst Biol Appl.* 2015;1:15003.
- 521 23. Pelillo M, Poli I, Roli A, Serra R, Slanzi D, Villani M. *Artificial Life and Evolutionary*  
522 *Computation.* Springer; 2018.
- 523 24. Schnell S, Turner TE. Reaction kinetics in intracellular environments with macromolecular  
524 crowding: simulations and rate laws. *Prog Biophys Mol Biol.* 2004 Jun;85(2–3):235–60.
- 525 25. Halatek J, Brauns F, Frey E. Self-organization principles of intracellular pattern formation.  
526 *Philos Trans R Soc B Biol Sci.* 2018;373(1747):20170107.
- 527 26. Yamada T, Bork P. Evolution of biomolecular networks — lessons from metabolic and  
528 protein interactions. *Nat Rev Mol Cell Biol.* 2009 Nov;10(11):791–803.



- 529 27. Laan L, Koschwanez JH, Murray AW. Evolutionary adaptation after crippling cell  
530 polarization follows reproducible trajectories. *eLife*. 2015;4:e09638.
- 531 28. Adams AE, Johnson DI, Longnecker RM, Sloat BF, Pringle JR. CDC42 and CDC43, two  
532 additional genes involved in budding and the establishment of cell polarity in the yeast  
533 *Saccharomyces cerevisiae*. *J Cell Biol*. 1990;111(1):131–142.
- 534 29. Klünder B, Freisinger T, Wedlich-Söldner R, Frey E. GDI-Mediated Cell Polarization in  
535 Yeast Provides Precise Spatial and Temporal Control of Cdc42 Signaling. Saucerman JJ,  
536 editor. *PLoS Comput Biol*. 2013 Dec 12;9(12):e1003396.
- 537 30. Zheng Y, Cerione R, Bender A. Control of the yeast bud-site assembly GTPase Cdc42.  
538 Catalysis of guanine nucleotide exchange by Cdc24 and stimulation of GTPase activity by  
539 Bem3. *J Biol Chem*. 1994;269(4):2369–2372.
- 540 31. Stevenson BJ, Ferguson B, De Virgilio C, Bi E, Pringle JR, Ammerer G, et al. Mutation of  
541 RGA1, which encodes a putative GTPase-activating protein for the polarity-establishment  
542 protein Cdc42p, activates the pheromone-response pathway in the yeast *Saccharomyces*  
543 *cerevisiae*. *Genes Dev*. 1995;9(23):2949–2963.
- 544 32. Smith GR, Givan SA, Cullen P, Sprague GF. GTPase-Activating Proteins for Cdc42.  
545 *Eukaryot Cell*. 2002 Jun 1;1(3):469–80.
- 546 33. Brauns F, de la Cruz LMI, Daalman WK-G, de Bruin I, Halatek J, Laan L, et al.  
547 Adaptability and evolution of the cell polarization machinery in budding yeast. *bioRxiv*.  
548 2020;
- 549 34. Tiedje C, Sakwa I, Just U, Höfken T. The rho gdi rdi1 regulates rho gtpases by distinct  
550 mechanisms. *Mol Biol Cell*. 2008;19(7):2885–2896.
- 551 35. Goranov AI, Cook M, Ricicova M, Ben-Ari G, Gonzalez C, Hansen C, et al. The rate of  
552 cell growth is governed by cell cycle stage. *Genes Dev*. 2009 Jun 15;23(12):1408–22.

- 553 36. Ferrezuelo F, Colomina N, Palmisano A, Garí E, Gallego C, Csikász-Nagy A, et al. The  
554 critical size is set at a single-cell level by growth rate to attain homeostasis and adaptation.  
555 Nat Commun. 2012 Aug 21;3:1012.
- 556 37. Vergés E, Colomina N, Garí E, Gallego C, Aldea M. Cyclin Cln3 Is Retained at the ER and  
557 Released by the J Chaperone Ydj1 in Late G1 to Trigger Cell Cycle Entry. Mol Cell. 2007  
558 Jun;26(5):649–62.
- 559 38. Grigull J, Mnaimneh S, Pootoolal J, Robinson MD, Hughes TR. Genome-Wide Analysis  
560 of mRNA Stability Using Transcription Inhibitors and Microarrays Reveals  
561 Posttranscriptional Control of Ribosome Biogenesis Factors. Mol Cell Biol. 2004 Jun  
562 15;24(12):5534–47.
- 563 39. Christiano R, Nagaraj N, Fröhlich F, Walther TC. Global Proteome Turnover Analyses of  
564 the Yeasts *S. cerevisiae* and *S. pombe*. Cell Rep. 2014 Dec;9(5):1959–65.
- 565 40. Friedman N, Cai L, Xie XS. Linking stochastic dynamics to population distribution: an  
566 analytical framework of gene expression. Phys Rev Lett. 2006;97(16):168302.
- 567 41. Chong YT, Koh JLY, Friesen H, Kaluarachchi Duffy S, Cox MJ, Moses A, et al. Yeast  
568 Proteome Dynamics from Single Cell Imaging and Automated Analysis. Cell. 2015  
569 Jun;161(6):1413–24.
- 570 42. Kulak NA, Pichler G, Paron I, Nagaraj N, Mann M. Minimal, encapsulated proteomic-  
571 sample processing applied to copy-number estimation in eukaryotic cells. Nat Methods.  
572 2014 Mar;11(3):319–24.
- 573 43. Moran KD, Kang H, Araujo AV, Zyla TR, Saito K, Tsygankov D, et al. Cell-cycle control  
574 of cell polarity in yeast. J Cell Biol. 2019 Jan 7;218(1):171–89.
- 575 44. Smith EN, Kruglyak L. Gene–Environment Interaction in Yeast Gene Expression. Mackay  
576 T, editor. PLoS Biol. 2008 Apr 15;6(4):e83.
- 577 45. Kass RE, Raftery AE. Bayes Factors. J Am Stat Assoc. 1995 Jun;90(430):773–95.

- 578 46. Goldstein B, Macara IG. The PAR Proteins: Fundamental Players in Animal Cell  
579 Polarization. *Dev Cell*. 2007 Nov;13(5):609–22.
- 580 47. Deutschbauer AM, Jaramillo DF, Proctor M, Kumm J, Hillenmeyer ME, Davis RW, et al.  
581 Mechanisms of Haploinsufficiency Revealed by Genome-Wide Profiling in Yeast.  
582 *Genetics*. 2005 Apr;169(4):1915–25.
- 583 48. Gillespie DT. Approximate accelerated stochastic simulation of chemically reacting  
584 systems. *J Chem Phys*. 2001 Jul 22;115(4):1716–33.
- 585 49. Gulli M-P, Jaquenoud M, Shimada Y, Niederhäuser G, Wiget P, Peter M. Phosphorylation  
586 of the Cdc42 exchange factor Cdc24 by the PAK-like kinase Cla4 may regulate polarized  
587 growth in yeast. *Mol Cell*. 2000;6(5):1155–1167.
- 588 50. Freisinger T, Klünder B, Johnson J, Müller N, Pichler G, Beck G, et al. Establishment of a  
589 robust single axis of cell polarity by coupling multiple positive feedback loops. *Nat*  
590 *Commun*. 2013 May 7;4:1807.
- 591 51. Stark C. BioGRID: a general repository for interaction datasets. *Nucleic Acids Res*. 2006  
592 Jan 1;34(90001):D535–9.
- 593 52. Cherry JM, Hong EL, Amundsen C, Balakrishnan R, Binkley G, Chan ET, et al.  
594 *Saccharomyces Genome Database: the genomics resource of budding yeast*. *Nucleic Acids*  
595 *Res*. 2012 Jan 1;40(D1):D700–5.
- 596 53. Stewart T, Strijbosch LWG, Moors H, Batenburg P van. A simple approximation to the  
597 convolution of gamma distributions. 2007;
- 598 54. da Silva J, Coetzer M, Nedellec R, Pastore C, Mosier DE. Fitness Epistasis and Constraints  
599 on Adaptation in a Human Immunodeficiency Virus Type 1 Protein Region. *Genetics*. 2010  
600 May;185(1):293–303.
- 601 55. Howell AS, Jin M, Wu C-F, Zyla TR, Elston TC, Lew DJ. Negative Feedback Enhances  
602 Robustness in the Yeast Polarity Establishment Circuit. *Cell*. 2012 Apr;149(2):322–33.

603

604

## 605 **Supporting Information**

606 The flow cytometry data (see S1 Dataset) was acquired using FlowJo CE software with  
607 a BD FACScan and later analyzed with home-written code in MATLAB. A single gamma  
608 distribution was maximum likelihood fitted on the fluorescence intensity counts of strains (from  
609 [49,50]) with simply endogenous *CDC42* ('background') or *CDC42p-GFP-CDC42* at 2%  
610 dextrose ('WT expression'). The WT expression distributions was analytically deconvolved for  
611 background counts using a gamma-sum approximation [53]. The average burst interval duration  
612 and average burst size result from these normalized distributions [40], a coarse doubling time  
613 estimate (200 min., processed as in [33]) for RWS1421 and the Cdc42p copy number estimate  
614 of 8700 from [42]. Calibration shows average burst sizes require a 20% reduction due to explicit  
615 inclusion of degradation in our model.

616

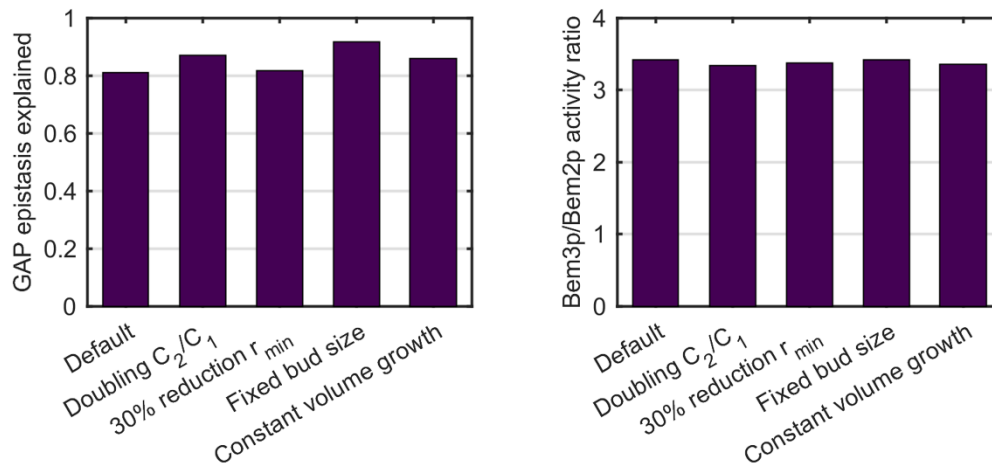

617

618 **S1 Fig. Negligible influence of model details on GAP epistasis.** Calculated GAP activity  
619 given model fits and abundancies from [42] (left) and relative multiplicative epistasis  
620 (definition of [54]) for the GAPs in the  $\Delta bem1 NRP1$  background for the growth model and  
621 four variations; doubling of membrane area growth rate  $C_1$ , 30% reduction of  $r_{min}$ , change of

622 second checkpoint to a fixed bud size threshold of 1.8  $\mu\text{m}$ , and constant cell volume instead of  
 623 area expansion. WT membrane growth rates are recalibrated in each case to match 83 minutes.  
 624

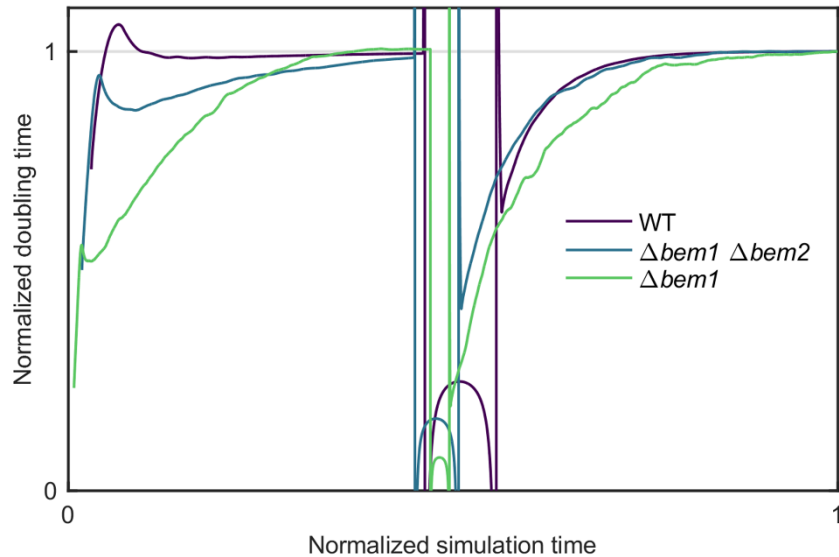

625  
 626 **S2 Fig. Convergence of simulated doubling times.** Doubling times as function of simulation  
 627 time for a fast (WT), medium ( $\Delta bem1 \Delta bem2$ ), and slow ( $\Delta bem1$ ) growing strain background.  
 628 Doubling times and simulation times normalized to their respective final value. The dilution  
 629 step midway temporarily causes unreliable estimates.  
 630

| Strain name | Genotype (W303 background)                                                                                                                  | Source |
|-------------|---------------------------------------------------------------------------------------------------------------------------------------------|--------|
| RWS116      | MATa <i>his3-11,15 ade2-1 can1-100 ura3</i><br><i>cln1::HisG Δcln2 cln3::HisG YipLac204-MET-CLN2::TRP1</i>                                  | [49]   |
| RWS1421     | MATa <i>his3-11,15 ade2-1 can1-100 ura3</i><br><i>cln1::HisG Δcln2 cln3::HisG YipLac204-MET-CLN2::TRP1</i><br><i>CDC42p-GFP-CDC42::URA3</i> | [50]   |

631 **S1 Table. Strain list.** Strains used in this study.

632

| Parameter                           | Symbol          | Value<br>(background)                                                                                                                        | Source                                                                                                                                                                                                   |
|-------------------------------------|-----------------|----------------------------------------------------------------------------------------------------------------------------------------------|----------------------------------------------------------------------------------------------------------------------------------------------------------------------------------------------------------|
| Cdc42 concentration threshold       | $[Cdc42]_{min}$ | 115 # proteins/ $\mu m^3$<br>( $\Delta bem1$ )<br>4 # proteins / $\mu m^3$<br>( $BEM1$ )<br>-62% ( $\Delta bem3$ )<br>-34% ( $\Delta bem2$ ) | This study, fitted                                                                                                                                                                                       |
| Minimum G1 time multiplier          | $t_{mut}$       | 1 ( $NRP1$ )<br>0.75 ( $\Delta nrp1$ )                                                                                                       | This study, fitted                                                                                                                                                                                       |
| Minimum polarization time           | $t_{pol,min}$   | 5 min.                                                                                                                                       | [55]                                                                                                                                                                                                     |
| Maximum polarization time           | $t_{pol,max}$   | 600 min.                                                                                                                                     | To truncate computations for cells with extremely low GAP content                                                                                                                                        |
| Polarization time scaling parameter | $\phi_{pol}$    | 25 ( $\Delta bem1$ )<br>500 ( $BEM1$ )                                                                                                       | $\phi_{pol,BEM1} \gg 1$ and<br>$\phi_{pol,BEM1} / \phi_{pol,\Delta bem1} \cong$<br>$[Cdc42]_{min,\Delta bem1}$<br>$/ [Cdc42]_{min,BEM1}$ for observed small excess Cdc42 across backgrounds (this study) |
| Minimum G1 time                     | $t_{G1,min}$    | 15.6 min.                                                                                                                                    | [36]                                                                                                                                                                                                     |
| Minimum radius to polarize          | $r_{min}$       | 2 $\mu m$                                                                                                                                    | [36]                                                                                                                                                                                                     |

|                                                                    |            |                                    |                                                                |
|--------------------------------------------------------------------|------------|------------------------------------|----------------------------------------------------------------|
| Maximum radius in G1                                               | $r_{max}$  | 6 $\mu\text{m}$                    | To truncate computations for cells with very low Cdc42 content |
| Average Cdc42 expression burst interval time                       | $t_{b,WT}$ | 57 min.                            | This study, assuming theory from [40]                          |
| Average Cdc42 expression burst size                                | $p_{b,WT}$ | 4900                               | This study, assuming theory from [40] and with calibration     |
| Cdc42p half-life                                                   | $\tau_h$   | 474 min.                           | [39]                                                           |
| Bud/mother volume ratio checkpoint 2                               | $c_r$      | 0.89                               | Consistent with [36]                                           |
| Ratio polarized/isotropic membrane area growth rates ( $C_2/C_1$ ) | $c_p$      | 2.13                               | Calibration                                                    |
| Isotropic membrane area growth rate                                | $C_1$      | 0.086 $\mu\text{m}^2/\text{min}$ . | Analytical considerations for optimized WT (see S1 Text)       |

633 **S2 Table. Growth model parameter list.**

634

635 **S1 Dataset. Flow cytometry and growth assay data.** Flow cytometry data (raw, processed  
636 and fitted) of strains used in this study, and OD<sub>600</sub> measurements of one strain (with fits).

637

638 **S1 Code. Numerical implementation in MATLAB of the growth model in this study.**

639

640 **S2 Script. Test script in MATLAB calling the numerical model implementation of S1**  
641 **Code.**

642

643 **S1 Text. Justification of membrane area growth rate value.** We assume an optimized WT  
644 such that at checkpoint 1, the minimum size requirement is typically met at the same time that  
645 the minimum G1 time requirement is met, and that subsequent polarization time is minimal.  
646 After G1, the (squared) mother radius is then (integrating the radius equation from 0 to  $t_{pol,min}$ ):

$$647 \quad \frac{dr_m}{dt} = \frac{C_1}{r_m} \Rightarrow r_m^2 = r_{min}^2 + \frac{C_1 t_{pol,min}}{2}$$

648 Thus, the bud radius is after next M-phase  $r_b=0.89 r_m$ . For self-consistency, this new cell must  
649 then expand to size  $r_{min}$  again at checkpoint 1, such that:

$$650 \quad r_{min}^2 = r_b^2 + \frac{C_1 t_{G1,min}}{2} = 0.79 r_{min}^2 + 0.79 \frac{C_1 t_{pol,min}}{2} + \frac{C_1 t_{G1,min}}{2}$$

$$651 \quad \Rightarrow C_1 = \frac{0.42 r_{min}^2}{0.79 t_{pol,min} + t_{G1,min}}$$

652 Using the values from S2 Table for  $r_{min}$ ,  $t_{pol,min}$ , and  $t_{G1,min}$ , this leads to  $C_1=0.086 \mu\text{m}^2/\text{min}$ .
